# Supplementary material
Source: PubMed Central journal article supplement (PMC3251029)
Supplement: supp_111.185728_jpet_185728_Supplemental_Figure_1.pdf [file supp_111.185728_jpet_185728_Supplemental_Figure_1.pdf]

The effects of repeated MDMA (3,4-methylenedioxymethamphetamine) administration on neurotransmitter efflux and sensory-evoked discharge in the ventral posterior medial thalamus.

Starr M.A, Page M.E., Waterhouse B.D

JPET

Supplemental Figure 1

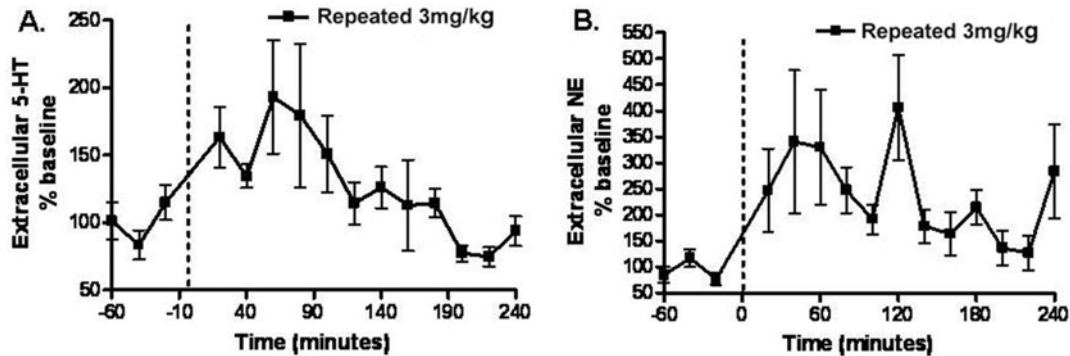

Supplemental Figure. 1. *The effects of chronic systemic MDMA on extracellular 5-HT levels in the VPM thalamus of the anesthetized rat.* Serotonin levels were measured using *in vivo* microdialysis with HPLC. Significant prolonged fluctuating increases in extracellular 5-HT were elicited by a challenge injection of MDMA (n=7). ( $F(6,12) = 2.353$ ;  $p = 0.013$ ; one-way repeated measures ANOVA. *B. The effects of chronic systemic MDMA on extracellular NE levels in the VPM thalamus of the anesthetized rat.* Norepinephrine levels in the rat VPM thalamus were measured using *in vivo* microdialysis with HPLC. Significant increases in extracellular NE were elicited by a challenge injection of MDMA (n=7). ( $F(6,12) = 1.933$ ;  $p = 0.0442$ ; one-way repeated measures ANOVA. All data are presented as the mean  $\pm$  S.E.M. The experimental protocol used in these studies was identical to those used in the waking animal with the following exceptions: On day 5 following chronic drug treatment, microdialysis probes were surgically implanted into the VPM thalamus under isoflurane anesthesia. Microdialysis probes were allowed to equilibrate for one hour prior to sample collection.
